# Supplementary figures and images for: Evidence and use of metal–chromophore interactions: luminescence dichroism of terthiophene-coated gold nanoparticles in polyethylene oriented films
Source: Royal Society of Chemistry journal article supplement (doi:10.1039/b409107h), 2004-01-01

## Supporting information

### *TGA desorption curves for DT and TT nanoparticles*

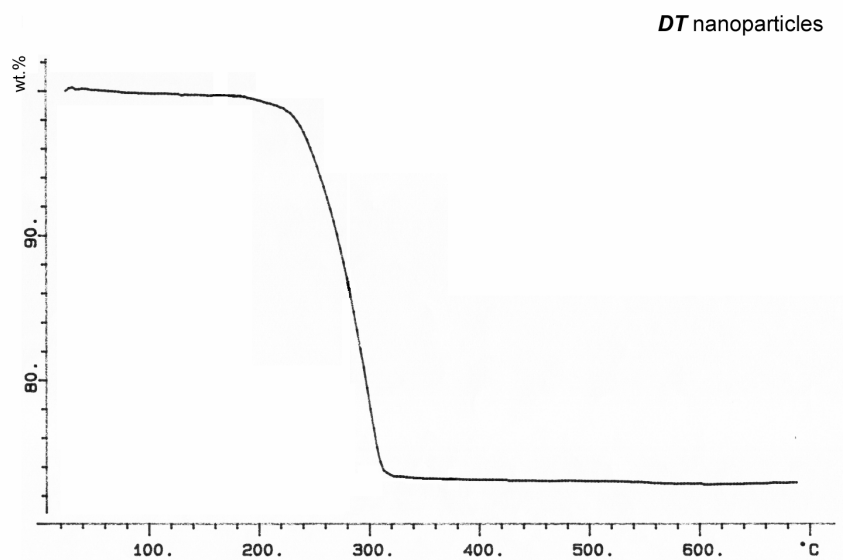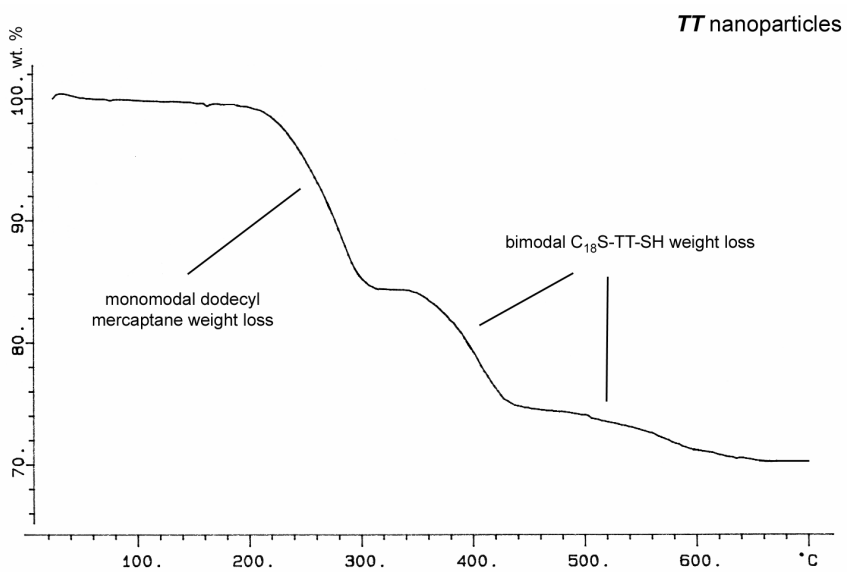

Supplement: b409107h.pdf [file b409107h.pdf]
